# Supplementary material for: Quantitative analysis of the effects of nicotinamide phosphoribosyltransferase induction on the rates of NAD+ synthesis and breakdown in mammalian cells using stable isotope-labeling combined with mass spectrometry
Source: PLOS journal article supplement (doi:10.1371/journal.pone.0214000), 2019-03-15
Supplement: S6 (10.1371/journal.pone.0214000.s006) [file journal.pone.0214000.s006]

**S6 Fig. Effects of induction of Nampt on the expression of NAD<sup>+</sup>-consuming enzymes.**

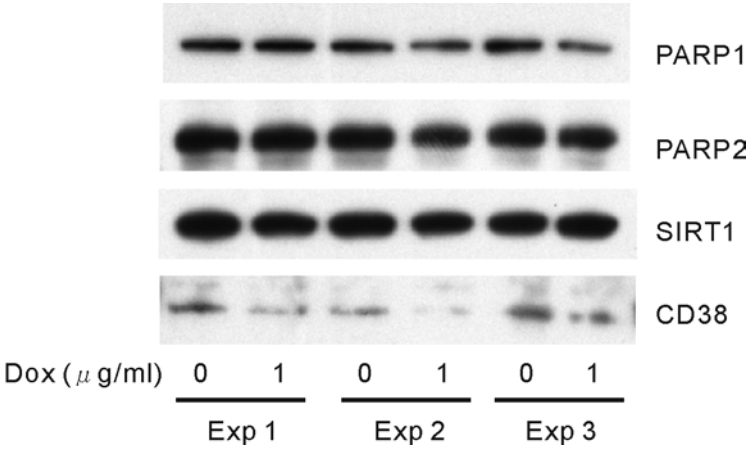

HeLa cell lysates used in Exp1-3 in S4 Fig were subjected to Western blot analysis to determine the expression of PARP1, PARP2, SIRT1, and CD38 with anti-human PARP1 monoclonal (1:1000 dilution, Santa Cruz, sc-74469), anti-human PARP2 polyclonal (1:10000 dilution, Active Motif, 39744), anti-human SIRT1 monoclonal (1:10000, Cell Signaling, #8469), and anti-human CD38 monoclonal (1:1000 dilution, Santa Cruz, sc-374650) antibodies, respectively.
